# Supplementary material for: Spectral, electrochemical and structural study of aryl derivatives of trans-stilbenes
Source: Royal Society of Chemistry journal article supplement (doi:10.1039/c2nj40531h), 2012-01-01
Supplement: c2nj40531h.pdf [file c2nj40531h.pdf]

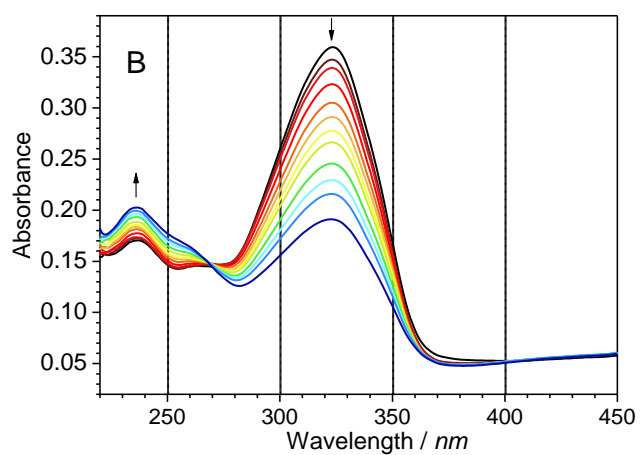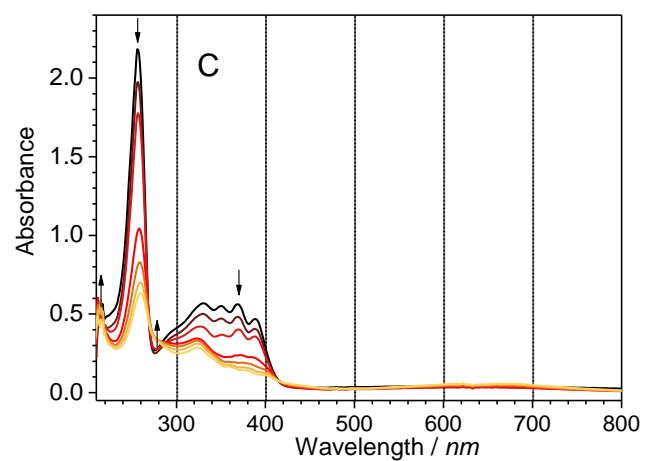

UV-vis absorbance recorded during oxidation of B and C. Measurements were carried out on ITO electrode. Arrows show the direction of changes. Spectra were measured in  $\text{CH}_2\text{Cl}_2/\text{Bu}_4\text{NBF}_4$  solutions.

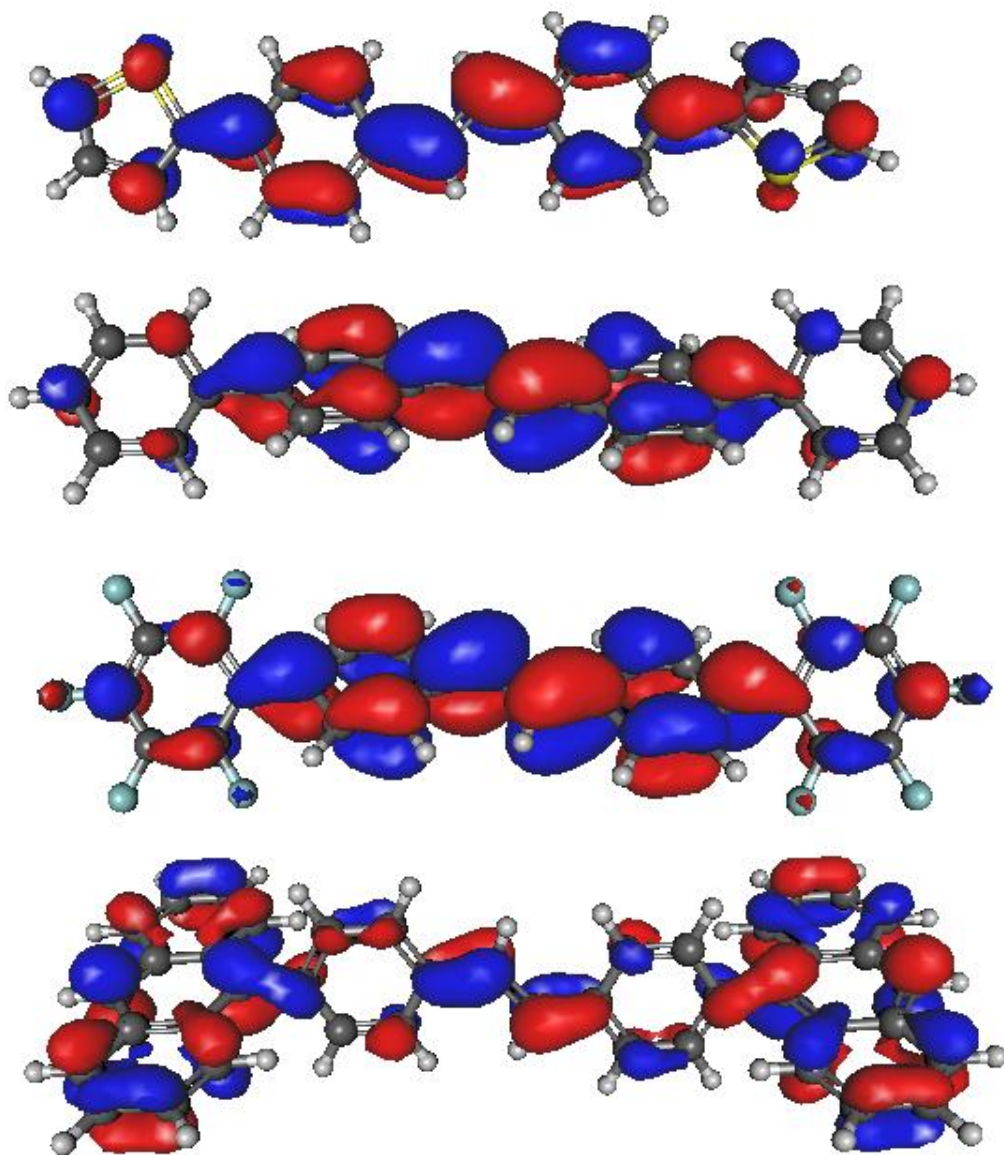

DFT-derived LUMO orbitals of the studied molecules.
